# Supplementary material
Source: PubMed Central journal article supplement (PMC3843255)
Supplement: ijcep0006-2745-f7.pdf [file ijcep0006-2745-f7.pdf]

## Biomarkers for paclitaxel sensitivity in hypopharynx cancer

**Supplementary Table 1.** Primers for qPCR validation

| Gene   | Forward                | Reverse                 |
|--------|------------------------|-------------------------|
| FOS    | ACTACCACTCACCCGCAGAC   | CCAGGTCCGTGCAGAAGT      |
| JUN    | TGCGGCCCGAAACT         | GGCGTTGAGGGCATCGT       |
| RND3   | GCGCTGCTCCATGTCTTC     | GCCGTGTAATTCTCAAACACTG  |
| EIF4A1 | AGCCCGAAGGCGTCATC      | TCCGAGAGGTTTCATGTCATCAA |
| IGFBP7 | GGCCCAGAAAAGCATGAAGTAA | TGGCACTCATATTCTCCAGCAT  |
| MRAS   | ACAAGGTCGATTTGATGCACT  | GCACTGGTTTCTATGTACGGAAT |
| PRKAA2 | CGGCTCTTTCAGCAGATTCTG  | TCAGGTCTCGATGAACAACCAT  |
| PLD1   | GGAAGGTGGGACGACAATGA   | CCAGAGACGGTCCTGAAGTGA   |
| CCL5   | CTCTGCGCTCCTGCATCTG    | AGTGGGCGGGCAATGTAG      |
| Actb   | GCATCCCCAAAGTTCACAA    | GGACTTCCTGTAACAACGCATCT |
